# Supplementary material for: Coral transplantation triggers shift in microbiome and promotion of coral disease associated potential pathogens
Source: PubMed Central journal article supplement (PMC4491727; doi:10.1038/srep11903), 2015-07-06
Supplement: srep11903-s1.pdf [file srep11903-s1.pdf]

# **Coral transplantation triggers shift in microbiome and promotion of coral disease associated potential pathogens**

Jordan M. Casey\*, Sean R. Connolly, Tracy D. Ainsworth

**Supplementary Table S1** | Assignments of bacterial genera into metabolic categories

(autotrophs, heterotrophs, and potential pathogens). “R” denotes reference for metabolic grouping.

| <b>Autotrophs</b>       | <b>R</b> | <b>Heterotrophs</b>          | <b>R</b> | <b>Potential pathogens</b>               | <b>R</b> |
|-------------------------|----------|------------------------------|----------|------------------------------------------|----------|
| <i>Anabaena</i>         | S1       | <i>Afifella</i>              | S25      | <i>Acinetobacter</i>                     | S65      |
| <i>Arthrospira</i>      | S2       | <i>Alicyclobacillus</i>      | S26      | <i>Aeromonas</i>                         | S66      |
| <i>Calothrix</i>        | S3       | <i>Andersenella</i>          | S27      | <i>Balneatrix</i>                        | S67      |
| <i>Chamaesiphon</i>     | S4       | <i>Candidatus</i> Microthrix | S28      | <i>Bartonella</i>                        | S68      |
| <i>Chroococidiopsis</i> | S5       | <i>Comamonadaceae</i>        | S29      | <i>Burkholderia</i>                      | S69      |
| <i>Coleochaete</i>      | S6       | <i>Congregibacter</i>        | S30      | <i>Candidatus</i><br><i>Amoebophilus</i> | S70      |
| <i>Crenothrix</i>       | S7       | <i>Cystobacterineae</i>      | S31      | <i>Chryseobacterium</i>                  | S71      |
| <i>Gloeobacter</i>      | S8       | <i>Endozoicomonas</i>        | S32      | <i>Corynebacterium</i>                   | S72      |
| <i>Leptospirillum</i>   | S9       | <i>Enhydrobacter</i>         | S33      | <i>Escherichia</i>                       | S73      |
| <i>Microcrocoleus</i>   | S10      | <i>Epulopiscium</i>          | S34      | <i>Geitlerinema</i> *                    | S74      |
| <i>Nitrosococcus</i>    | S11      | <i>Geobacter</i>             | S35      | <i>Gordonia</i>                          | S75      |
| <i>Pedinomonas</i>      | S12      | <i>Haliea</i>                | S36      | <i>Halomonas</i>                         | S76      |
| <i>Pellia</i>           | S13      | <i>Kangiella</i>             | S37      | <i>Leptolyngbya</i> *                    | S74      |
| <i>Pleurocapsa</i>      | S14      | <i>Labrenzia</i>             | S38      | <i>Micrococcus</i>                       | S77      |
| <i>Prochlorococcus</i>  | S15      | <i>Lactobacillus</i>         | S39      | <i>Mycoplasma</i>                        | S78      |
| <i>Prochlorothrix</i>   | S16, S17 | <i>Leucothrix</i>            | S40      | <i>Oscillatoria</i> *                    | S74      |
| <i>Pseudanabaena</i>    | S18      | <i>Magnetospirillum</i>      | S41      | <i>Propionibacterium</i>                 | S79      |
| <i>Rhodovibrio</i>      | S19      | <i>Marinobacter</i>          | S42      | <i>Pseudomonas</i>                       | S80      |
| <i>Rivularia</i>        | S20      | <i>Massilia</i>              | S43      | <i>Ralstonia</i>                         | S81      |
| <i>Scherffelia</i>      | S21      | <i>Mesorhizobium</i>         | S44      | <i>Sphingomonas</i> *                    | S82      |
| <i>Spirulina</i>        | S22      | <i>Methylobacterium</i>      | S45      | <i>Staphylococcus</i>                    | S83      |
| <i>Synechococcus</i>    | S23      | <i>Microbulbifer</i>         | S38      |                                          |          |
| <i>Trichodesmium</i>    | S24      | <i>Muricauda</i>             | S46      |                                          |          |
|                         |          | <i>Nannocystineae</i>        | S31      |                                          |          |
|                         |          | <i>Neptunomonas</i>          | S47      |                                          |          |
|                         |          | <i>Nitratireductor</i>       | S48      |                                          |          |
|                         |          | <i>Oceanospirillum</i>       | S49      |                                          |          |
|                         |          | <i>Pelagibius</i>            | S50      |                                          |          |
|                         |          | <i>Pelobacter</i>            | S51      |                                          |          |
|                         |          | <i>Phyllobacteriaceae</i>    | S52      |                                          |          |
|                         |          | <i>Pseudovibrio</i>          | S38      |                                          |          |
|                         |          | <i>Rheinheimera</i>          | S53      |                                          |          |
|                         |          | <i>Rhodobacteraceae</i>      | S54      |                                          |          |
|                         |          | <i>Rhodobium</i>             | S55      |                                          |          |
|                         |          | <i>Rhodopirellula</i>        | S56      |                                          |          |
|                         |          | <i>Rhodospirillaceae</i>     | S57      |                                          |          |
|                         |          | <i>Rhodovulum</i>            | S58      |                                          |          |
|                         |          | <i>Rubrobacter</i>           | S59      |                                          |          |
|                         |          | <i>Ruegeria</i>              | S60      |                                          |          |
|                         |          | <i>Salinicoccus</i>          | S61      |                                          |          |
|                         |          | <i>Thalassospira</i>         | S62      |                                          |          |
|                         |          | <i>Wenxinia</i>              | S63      |                                          |          |
|                         |          | <i>Wolbachia</i>             | S64      |                                          |          |

\**Geitlerinema*, *Leptolyngbya*, *Oscillatoria*, and *Sphingomonas* are coral-specific potential pathogens.

The first three genera are associated with black band disease.

**Supplementary Table S2** | Assignments of OTUs with at least a two percent relative abundance to genus or next lowest taxonomical unit and their respective relative abundance in each baseline coral sample from control plots.

| Taxa                               | Coral Sample |       |       |       |       |       |       |       |
|------------------------------------|--------------|-------|-------|-------|-------|-------|-------|-------|
|                                    | 1            | 2     | 3     | 4     | 5     | 6     | 7     | 8     |
| <i>Enhydrobacter</i>               | 7.06         | 0.00  | 0.00  | 0.00  | 0.00  | 0.00  | 0.00  | 0.00  |
| <i>Pseudomonas</i>                 | 27.82        | 1.57  | 2.97  | 0.11  | 0.39  | 0.79  | 0.13  | 0.00  |
| <i>Candidatus<br/>Amoebophilus</i> | 0.00         | 0.00  | 0.00  | 0.00  | 4.69  | 16.79 | 0.13  | 53.63 |
| <i>Microbulbifer</i>               | 0.00         | 0.23  | 0.12  | 4.63  | 0.00  | 0.73  | 0.39  | 0.00  |
| <i>Neptunomonas</i>                | 2.82         | 49.71 | 54.44 | 5.99  | 35.09 | 36.62 | 19.34 | 1.34  |
| <i>Gloeotrichia</i>                | 0.00         | 0.00  | 0.00  | 0.00  | 4.20  | 2.49  | 2.50  | 4.39  |
| <i>Marinobacter</i>                | 0.42         | 16.29 | 13.54 | 0.32  | 6.74  | 5.54  | 3.68  | 0.76  |
| <i>Staphylococcus</i>              | 3.25         | 0.02  | 0.02  | 0.00  | 0.00  | 1.09  | 0.79  | 0.00  |
| <i>Rubrobacter</i>                 | 0.00         | 0.00  | 0.00  | 0.00  | 2.15  | 0.00  | 0.00  | 0.00  |
| <i>Sphingomonas</i>                | 0.00         | 0.00  | 0.00  | 0.00  | 0.00  | 0.00  | 0.00  | 10.50 |
| <i>Propionibacterium</i>           | 5.79         | 0.00  | 0.02  | 0.00  | 3.13  | 0.00  | 0.26  | 1.72  |
| <i>Geitlerinema</i>                | 0.00         | 0.17  | 0.21  | 0.21  | 0.29  | 0.30  | 1.05  | 8.59  |
| <i>Congregibacter</i>              | 0.00         | 0.90  | 0.06  | 13.04 | 0.00  | 2.68  | 0.00  | 0.00  |
| <i>Methylobacterium</i>            | 18.36        | 0.00  | 0.00  | 0.11  | 9.87  | 0.00  | 0.39  | 0.00  |
| <i>Pelobacter</i>                  | 0.00         | 0.00  | 0.08  | 0.00  | 2.93  | 0.00  | 0.00  | 0.00  |
| <i>Corynebacterium</i>             | 5.65         | 0.00  | 0.00  | 0.00  | 0.00  | 0.00  | 0.00  | 0.00  |
| <i>Oceanospirillum</i>             | 0.56         | 8.68  | 13.36 | 69.40 | 8.80  | 23.60 | 23.55 | 1.91  |
| <i>Lactobacillus</i>               | 0.00         | 0.00  | 0.00  | 0.00  | 0.00  | 0.00  | 2.76  | 0.00  |
| <i>Rheinheimera</i>                | 24.72        | 0.00  | 0.00  | 0.00  | 0.00  | 0.00  | 0.00  | 0.00  |
| <i>Halomonas</i>                   | 0.56         | 21.27 | 13.21 | 1.05  | 8.99  | 5.29  | 3.42  | 0.00  |
| <i>Alicyclobacillus</i>            | 2.54         | 0.13  | 0.02  | 0.95  | 8.70  | 0.61  | 26.58 | 14.69 |
| <i>Thalassospira</i>               | 0.00         | 0.00  | 0.00  | 0.00  | 0.00  | 0.00  | 3.29  | 0.00  |
| <i>Aeromonas</i>                   | 0.00         | 0.00  | 0.00  | 0.00  | 0.00  | 0.00  | 2.11  | 0.00  |

**Supplementary Table S3** | Assignments of OTUs with at least a two percent relative abundance to genus or next lowest taxonomical unit and their respective relative abundance in each baseline coral sample from *S. apicalis*' territories.

| Taxa                               | Coral Sample |       |       |       |       |       |       |
|------------------------------------|--------------|-------|-------|-------|-------|-------|-------|
|                                    | 1            | 2     | 3     | 4     | 5     | 6     | 7     |
| <i>Rhodovibrio</i>                 | 0.00         | 0.00  | 0.00  | 0.00  | 3.28  | 0.00  | 0.00  |
| <i>Pseudomonas</i>                 | 0.40         | 10.64 | 0.73  | 1.48  | 1.50  | 2.19  | 1.61  |
| <i>Candidatus<br/>Amoebophilus</i> | 0.10         | 0.00  | 3.85  | 0.00  | 5.87  | 0.00  | 4.44  |
| <i>Neptunomonas</i>                | 33.30        | 2.23  | 41.28 | 13.05 | 12.57 | 28.69 | 48.06 |
| <i>Gloeotrichia</i>                | 9.43         | 8.42  | 1.47  | 0.25  | 6.01  | 0.00  | 1.14  |
| <i>Chryseobacterium</i>            | 0.00         | 2.48  | 0.00  | 0.00  | 0.00  | 0.00  | 0.00  |
| <i>Marinobacter</i>                | 1.50         | 0.00  | 1.28  | 6.16  | 3.83  | 6.57  | 11.22 |
| <i>Bartonella</i>                  | 0.00         | 0.25  | 0.00  | 20.69 | 0.41  | 0.00  | 0.00  |
| <i>Gordonia</i>                    | 0.00         | 7.43  | 0.00  | 0.00  | 0.00  | 0.00  | 0.00  |
| <i>Propionibacterium</i>           | 0.50         | 0.00  | 4.40  | 8.37  | 0.00  | 2.99  | 0.38  |
| <i>Ruegeria</i>                    | 0.00         | 0.00  | 0.00  | 0.00  | 0.00  | 2.99  | 0.00  |
| <i>Prochlorococcus</i>             | 6.22         | 0.00  | 5.69  | 3.45  | 2.05  | 0.20  | 0.00  |
| <i>Pelobacter</i>                  | 0.00         | 0.00  | 0.00  | 3.69  | 0.41  | 1.99  | 0.03  |
| <i>Corynebacterium</i>             | 0.00         | 9.65  | 0.00  | 0.00  | 0.00  | 0.00  | 0.06  |
| <i>Salinicoccus</i>                | 0.00         | 2.48  | 0.00  | 0.00  | 0.00  | 0.00  | 0.00  |
| <i>Oceanospirillum</i>             | 36.51        | 25.74 | 15.96 | 18.47 | 55.60 | 38.25 | 10.87 |
| <i>Epulopiscium</i>                | 0.00         | 0.00  | 2.20  | 0.00  | 0.00  | 0.00  | 0.00  |
| <i>Halomonas</i>                   | 1.40         | 0.00  | 0.55  | 5.91  | 2.05  | 4.78  | 18.36 |
| <i>Alicyclobacillus</i>            | 1.60         | 0.00  | 18.72 | 8.87  | 2.32  | 1.39  | 1.17  |
| <i>Leucothrix</i>                  | 0.00         | 26.49 | 0.00  | 0.00  | 0.00  | 0.00  | 0.00  |

**Supplementary Table S4** | Assignments of OTUs with at least a two percent relative abundance to genus or next lowest taxonomical unit and their respective relative abundance in each baseline coral sample from *S. nigricans*' territories.

| Taxa                               | Coral Sample |       |       |       |       |       |       |       |       |
|------------------------------------|--------------|-------|-------|-------|-------|-------|-------|-------|-------|
|                                    | 1            | 2     | 3     | 4     | 5     | 6     | 7     | 8     | 9     |
| <i>Ralstonia</i>                   | 2.31         | 0.00  | 0.84  | 2.02  | 0.06  | 0.24  | 1.28  | 0.47  | 3.42  |
| <i>Marinobacter</i>                | 2.57         | 17.12 | 6.90  | 3.95  | 15.15 | 15.26 | 13.76 | 13.22 | 6.12  |
| <i>Pelobacter</i>                  | 0.13         | 0.19  | 3.23  | 3.34  | 0.14  | 0.00  | 0.00  | 0.00  | 0.00  |
| <i>Oceanospirillum</i>             | 8.35         | 5.07  | 21.74 | 12.26 | 6.56  | 1.36  | 2.68  | 4.75  | 7.68  |
| <i>Congregibacter</i>              | 3.98         | 0.00  | 0.00  | 0.00  | 0.00  | 0.00  | 0.00  | 0.00  | 0.00  |
| <i>Magnetospirillum</i>            | 0.00         | 0.00  | 0.00  | 0.00  | 0.00  | 0.00  | 0.00  | 0.00  | 23.59 |
| <i>Neptunomonas</i>                | 20.74        | 60.37 | 46.42 | 40.20 | 62.99 | 59.86 | 54.19 | 46.58 | 25.15 |
| <i>Acinetobacter</i>               | 47.64        | 8.91  | 11.63 | 32.29 | 7.23  | 17.64 | 20.97 | 21.22 | 27.27 |
| <i>Candidatus<br/>Amoebophilus</i> | 9.21         | 0.00  | 5.85  | 0.00  | 0.00  | 0.00  | 0.00  | 0.00  | 0.00  |
| <i>Halomonas</i>                   | 0.60         | 5.74  | 1.99  | 1.27  | 6.67  | 3.40  | 5.50  | 4.43  | 1.89  |
| <i>Gloetrichia</i>                 | 0.39         | 0.00  | 0.47  | 0.04  | 0.00  | 0.00  | 0.00  | 6.88  | 0.00  |

**Supplementary Table S5** | Assignments of OTUs with at least a two percent relative abundance to genus or next lowest taxonomical unit and their respective relative abundance in each coral sample after six months of transplantation from control plots.

| Taxa                               | Coral Sample |       |       |       |       |       |       |
|------------------------------------|--------------|-------|-------|-------|-------|-------|-------|
|                                    | 1            | 2     | 3     | 4     | 5     | 6     | 7     |
| <i>Trichodesmium</i>               | 0.00         | 0.19  | 9.99  | 0.00  | 1.43  | 0.00  | 0.12  |
| <i>Synechococcus</i>               | 0.34         | 0.14  | 3.28  | 0.00  | 0.71  | 0.58  | 2.55  |
| <i>Marinobacter</i>                | 12.55        | 18.07 | 0.08  | 0.28  | 0.89  | 0.07  | 0.54  |
| <i>Pelobacter</i>                  | 1.27         | 2.13  | 0.00  | 2.15  | 0.00  | 0.00  | 0.22  |
| <i>Spirulina</i>                   | 0.07         | 0.00  | 1.20  | 0.00  | 2.32  | 0.66  | 0.52  |
| <i>Anabaena</i>                    | 0.48         | 0.19  | 2.96  | 0.00  | 2.14  | 12.35 | 8.49  |
| <i>Geitlerinema</i>                | 0.11         | 0.05  | 0.40  | 0.00  | 1.07  | 2.34  | 3.15  |
| <i>Oceanospirillum</i>             | 1.45         | 2.13  | 0.00  | 14.26 | 0.00  | 0.00  | 0.00  |
| <i>Ruegeria</i>                    | 0.41         | 0.00  | 2.32  | 0.00  | 1.60  | 0.58  | 1.00  |
| <i>Afifella</i>                    | 0.04         | 0.00  | 0.00  | 0.00  | 0.89  | 4.09  | 0.86  |
| <i>Neptunomonas</i>                | 32.48        | 58.86 | 0.00  | 3.18  | 0.00  | 0.07  | 0.02  |
| <i>Acinetobacter</i>               | 14.00        | 9.66  | 0.48  | 50.59 | 0.00  | 0.00  | 0.06  |
| <i>Oscillatoria</i>                | 1.90         | 0.00  | 27.98 | 0.00  | 24.24 | 37.72 | 17.63 |
| <i>Bartonella</i>                  | 17.39        | 0.00  | 0.08  | 0.00  | 0.89  | 0.07  | 1.55  |
| <i>Leptolyngbya</i>                | 0.15         | 0.07  | 20.86 | 0.00  | 16.40 | 7.09  | 10.70 |
| <i>Rhodopirellula</i>              | 0.00         | 0.00  | 0.24  | 0.14  | 2.32  | 1.24  | 1.22  |
| <i>Mesorhizobium</i>               | 0.60         | 0.00  | 0.16  | 0.00  | 2.67  | 1.17  | 0.80  |
| <i>Candidatus<br/>Amoebophilus</i> | 4.54         | 0.00  | 0.40  | 0.21  | 0.36  | 0.37  | 0.30  |
| <i>Pseudanabaena</i>               | 0.00         | 0.00  | 0.00  | 0.00  | 5.70  | 1.17  | 0.12  |
| <i>Halomonas</i>                   | 3.28         | 5.53  | 0.00  | 0.00  | 0.18  | 0.00  | 0.10  |
| <i>Labrenzia</i>                   | 0.71         | 0.00  | 0.56  | 0.00  | 1.43  | 1.39  | 2.47  |
| <i>Kangiella</i>                   | 0.00         | 0.00  | 0.16  | 9.41  | 0.00  | 0.00  | 0.02  |
| <i>Escherichia</i>                 | 0.00         | 0.00  | 0.00  | 14.67 | 0.00  | 0.07  | 0.00  |
| <i>Rhodovibrio</i>                 | 0.15         | 0.00  | 0.56  | 0.00  | 0.00  | 0.66  | 2.03  |
| <i>Gloeotrichia</i>                | 2.38         | 0.00  | 0.72  | 0.00  | 3.92  | 0.58  | 4.32  |
| <i>Prochlorothrix</i>              | 0.07         | 0.00  | 1.28  | 0.00  | 0.71  | 0.95  | 2.17  |

**Supplementary Table S6** | Assignments of OTUs with at least a two percent relative abundance to genus or next lowest taxonomical unit and their respective relative abundance in each coral sample after six months of transplantation from *S. apicalis*' territories.

| Taxa                             | Coral Sample |       |       |       |       |       |       |       |
|----------------------------------|--------------|-------|-------|-------|-------|-------|-------|-------|
|                                  | 1            | 2     | 3     | 4     | 5     | 6     | 7     | 8     |
| <i>Trichodesmium</i>             | 0.00         | 0.06  | 0.17  | 0.00  | 0.31  | 2.63  | 0.30  | 1.75  |
| <i>Ralstonia</i>                 | 11.02        | 0.04  | 0.91  | 1.78  | 0.00  | 0.00  | 0.00  | 0.00  |
| <i>Synechococcus</i>             | 0.25         | 0.08  | 0.02  | 0.00  | 2.08  | 3.57  | 1.69  | 2.21  |
| <i>Marinobacter</i>              | 0.33         | 18.94 | 21.10 | 8.08  | 0.23  | 0.66  | 0.70  | 0.93  |
| <i>Pelobacter</i>                | 0.00         | 0.61  | 0.47  | 5.37  | 0.62  | 0.00  | 0.30  | 1.05  |
| <i>Geobacter</i>                 | 3.14         | 0.00  | 0.09  | 0.42  | 0.00  | 0.00  | 0.60  | 0.00  |
| <i>Gloeobacter</i>               | 0.00         | 0.00  | 0.00  | 0.00  | 0.54  | 0.00  | 0.20  | 8.16  |
| <i>Spirulina</i>                 | 0.00         | 0.00  | 0.00  | 0.00  | 6.01  | 2.73  | 2.49  | 4.55  |
| <i>Anabaena</i>                  | 0.00         | 0.55  | 0.00  | 0.00  | 8.64  | 5.93  | 12.62 | 8.04  |
| <i>Geitlerinema</i>              | 0.00         | 0.00  | 0.00  | 0.00  | 1.93  | 1.03  | 2.19  | 1.63  |
| <i>Oceanospirillum</i>           | 1.61         | 3.52  | 2.70  | 10.41 | 0.15  | 0.00  | 0.00  | 0.00  |
| <i>Ruegeria</i>                  | 0.77         | 0.06  | 0.00  | 0.06  | 2.78  | 1.41  | 0.70  | 1.75  |
| <i>Wolbachia</i>                 | 0.00         | 0.00  | 0.00  | 0.16  | 2.54  | 1.41  | 0.50  | 0.00  |
| <i>Neptunomonas</i>              | 0.54         | 63.77 | 51.38 | 39.20 | 0.00  | 0.38  | 0.00  | 0.12  |
| <i>Acinetobacter</i>             | 73.11        | 5.47  | 14.16 | 21.36 | 0.15  | 0.00  | 0.10  | 0.00  |
| <i>Candidatus<br/>Microthrix</i> | 0.00         | 0.00  | 0.00  | 0.06  | 2.39  | 0.56  | 0.00  | 1.05  |
| <i>Oscillatoria</i>              | 0.02         | 0.55  | 0.02  | 0.00  | 14.80 | 16.65 | 20.97 | 14.34 |
| <i>Prochlorococcus</i>           | 0.08         | 0.00  | 0.00  | 0.00  | 2.00  | 0.09  | 0.00  | 3.73  |
| <i>Leptolyngbya</i>              | 0.08         | 0.19  | 0.00  | 0.03  | 14.34 | 7.24  | 22.07 | 7.23  |
| <i>Halomonas</i>                 | 0.00         | 3.77  | 5.96  | 2.94  | 0.00  | 0.00  | 0.10  | 0.00  |
| <i>Labrenzia</i>                 | 0.13         | 0.15  | 0.11  | 0.00  | 0.46  | 2.16  | 2.09  | 0.93  |
| <i>Rhodovibrio</i>               | 0.00         | 0.00  | 0.02  | 0.00  | 0.23  | 0.94  | 0.50  | 3.15  |
| <i>Chamaesiphon</i>              | 0.00         | 0.00  | 0.00  | 0.00  | 0.00  | 0.19  | 2.58  | 1.86  |
| <i>Gloeotrichia</i>              | 0.00         | 0.00  | 0.00  | 1.07  | 1.00  | 2.26  | 0.99  | 1.63  |

**Supplementary Table S7** | Assignments of OTUs with at least a two percent relative abundance to genus or next lowest taxonomical unit and their respective relative abundance in each coral sample after six months of transplantation from *S. nigricans*' territories.

| Taxa                    | Coral Sample |       |      |       |      |       |       |       |      |
|-------------------------|--------------|-------|------|-------|------|-------|-------|-------|------|
|                         | 1            | 2     | 3    | 4     | 5    | 6     | 7     | 8     | 9    |
| <i>Balneatrix</i>       | 2.16         | 0.79  | 2.12 | 2.12  | 1.66 | 4.47  | 0.14  | 0.03  | 1.95 |
| Rhodobacteraceae        | 2.65         | 4.86  | 7.41 | 8.73  | 4.62 | 6.50  | 0.56  | 0.39  | 7.00 |
| <i>Rhodobium</i>        | 1.94         | 0.12  | 1.15 | 1.92  | 2.70 | 1.72  | 0.14  | 0.03  | 2.28 |
| <i>Andersenella</i>     | 0.35         | 2.32  | 1.02 | 0.56  | 0.50 | 0.23  | 0.00  | 0.08  | 0.39 |
| <i>Pedinomonas</i>      | 0.00         | 0.46  | 0.13 | 0.70  | 0.68 | 0.13  | 8.11  | 0.49  | 1.44 |
| <i>Crenothrix</i>       | 0.77         | 2.28  | 2.81 | 5.05  | 3.56 | 3.70  | 0.35  | 0.00  | 3.00 |
| <i>Prochlorothrix</i>   | 0.35         | 0.58  | 2.12 | 1.19  | 0.27 | 0.08  | 0.35  | 0.00  | 0.30 |
| <i>Pleurocapsa</i>      | 1.23         | 0.66  | 6.16 | 2.26  | 2.43 | 2.93  | 0.35  | 0.03  | 1.23 |
| <i>Nitratireductor</i>  | 0.09         | 0.00  | 0.33 | 0.31  | 0.15 | 0.10  | 6.01  | 0.00  | 0.21 |
| <i>Leptolyngbya</i>     | 3.81         | 0.62  | 5.80 | 5.69  | 3.53 | 5.09  | 2.52  | 0.03  | 5.83 |
| <i>Endozoicomonas</i>   | 0.07         | 50.73 | 0.26 | 0.07  | 0.86 | 0.05  | 45.98 | 88.78 | 0.00 |
| <i>Prochlorococcus</i>  | 0.04         | 1.37  | 1.41 | 0.45  | 2.40 | 0.10  | 1.12  | 0.33  | 0.45 |
| Nannocystineae          | 3.11         | 0.75  | 1.23 | 1.90  | 1.96 | 2.26  | 0.42  | 0.05  | 2.22 |
| <i>Arthrospira</i>      | 0.57         | 0.12  | 2.40 | 0.22  | 1.01 | 0.82  | 0.70  | 0.00  | 0.45 |
| Cystobacterineae        | 0.62         | 4.86  | 1.99 | 0.47  | 0.50 | 0.10  | 1.40  | 0.13  | 0.36 |
| Comamonadaceae          | 0.90         | 0.58  | 0.72 | 1.10  | 1.22 | 2.36  | 0.84  | 0.08  | 5.68 |
| Phyllobacteriaceae      | 2.78         | 0.95  | 0.64 | 1.22  | 1.24 | 0.82  | 0.07  | 0.03  | 0.93 |
| <i>Chroococidiopsis</i> | 0.75         | 0.29  | 2.15 | 2.69  | 1.72 | 4.96  | 0.21  | 0.00  | 2.55 |
| <i>Wenxinia</i>         | 0.82         | 2.20  | 1.92 | 1.19  | 1.27 | 0.54  | 0.77  | 0.08  | 0.84 |
| <i>Micrococcus</i>      | 0.00         | 0.00  | 0.00 | 0.00  | 0.00 | 0.00  | 2.80  | 0.00  | 0.00 |
| <i>Oscillatoria</i>     | 5.31         | 0.71  | 1.33 | 2.89  | 1.60 | 11.74 | 0.63  | 0.00  | 0.87 |
| Rhodospirillaceae       | 8.38         | 0.62  | 4.91 | 6.20  | 7.47 | 5.70  | 0.28  | 0.15  | 6.73 |
| <i>Rivularia</i>        | 4.39         | 3.57  | 9.20 | 11.24 | 8.45 | 3.06  | 0.98  | 0.05  | 3.06 |
| <i>Leptospirillum</i>   | 2.05         | 0.04  | 1.28 | 0.57  | 1.84 | 1.49  | 0.00  | 0.00  | 2.16 |



**Supplementary Table S8** | Assignments of OTUs with at least a two percent relative abundance to genus or next lowest taxonomical unit and their respective relative abundance in each coral sample after one year of transplantation from control plots.

| Taxa                   | Coral Sample |       |       |       |      |       |       |       |      |
|------------------------|--------------|-------|-------|-------|------|-------|-------|-------|------|
|                        | 1            | 2     | 3     | 4     | 5    | 6     | 7     | 8     | 9    |
| <i>Haliea</i>          | 1.21         | 0.13  | 0.00  | 0.17  | 0.99 | 0.19  | 0.36  | 0.39  | 2.03 |
| <i>Balneatrix</i>      | 4.38         | 0.28  | 0.00  | 0.04  | 2.13 | 2.35  | 1.97  | 0.42  | 3.32 |
| <i>Muricauda</i>       | 1.11         | 0.04  | 0.00  | 0.00  | 2.57 | 1.20  | 0.87  | 1.00  | 0.65 |
| Rhodobacteraceae       | 6.26         | 0.61  | 0.00  | 1.86  | 7.22 | 9.39  | 4.30  | 3.80  | 4.50 |
| <i>Pedinomonas</i>     | 0.25         | 0.43  | 0.06  | 0.72  | 1.03 | 3.73  | 2.02  | 1.58  | 1.74 |
| <i>Crenothrix</i>      | 3.82         | 0.09  | 0.00  | 0.13  | 0.94 | 8.49  | 14.67 | 1.62  | 1.10 |
| <i>Pleurocapsa</i>     | 2.44         | 0.04  | 0.00  | 0.21  | 1.19 | 1.61  | 0.79  | 0.70  | 1.27 |
| <i>Ruegeria</i>        | 1.16         | 0.17  | 0.34  | 0.30  | 0.92 | 0.57  | 0.74  | 0.93  | 2.34 |
| <i>Leptolyngbya</i>    | 9.44         | 0.19  | 0.00  | 0.38  | 2.59 | 3.43  | 2.42  | 2.06  | 3.83 |
| <i>Burkholderia</i>    | 0.03         | 0.19  | 0.26  | 2.53  | 0.00 | 0.00  | 0.00  | 0.00  | 0.03 |
| <i>Endozoicomonas</i>  | 0.06         | 86.58 | 94.78 | 7.34  | 0.10 | 0.03  | 0.02  | 0.22  | 0.23 |
| <i>Microcoleus</i>     | 0.08         | 0.09  | 0.00  | 0.00  | 0.21 | 0.03  | 0.07  | 0.65  | 5.40 |
| <i>Geitlerinema</i>    | 0.83         | 0.00  | 0.00  | 0.00  | 1.38 | 1.56  | 2.07  | 0.62  | 0.39 |
| <i>Anabaena</i>        | 0.76         | 0.04  | 0.00  | 0.04  | 2.91 | 0.73  | 2.06  | 1.58  | 0.76 |
| <i>Calothrix</i>       | 9.47         | 0.06  | 0.00  | 0.00  | 1.05 | 0.13  | 0.63  | 0.02  | 0.25 |
| <i>Prochlorococcus</i> | 2.29         | 0.30  | 0.09  | 0.51  | 0.59 | 1.40  | 0.86  | 0.49  | 0.37 |
| <i>Scherffelia</i>     | 0.67         | 0.43  | 0.40  | 17.30 | 0.64 | 1.47  | 2.64  | 2.78  | 2.22 |
| Nannocystineae         | 3.30         | 0.09  | 0.00  | 0.08  | 1.62 | 0.79  | 0.70  | 0.57  | 3.52 |
| <i>Trichodesmium</i>   | 0.17         | 0.00  | 0.00  | 0.00  | 2.36 | 0.14  | 0.05  | 0.00  | 0.08 |
| <i>Arthrospira</i>     | 0.33         | 0.00  | 0.00  | 2.95  | 0.23 | 0.84  | 0.10  | 0.00  | 0.00 |
| Cystobacterineae       | 1.07         | 0.32  | 2.38  | 2.49  | 1.19 | 0.90  | 0.51  | 0.39  | 0.51 |
| <i>Pseudovibrio</i>    | 0.00         | 0.00  | 0.00  | 0.00  | 6.40 | 0.00  | 0.21  | 0.06  | 0.00 |
| <i>Acinetobacter</i>   | 0.02         | 0.04  | 0.09  | 34.56 | 0.00 | 0.02  | 0.10  | 0.12  | 0.03 |
| <i>Rhodovulum</i>      | 0.07         | 0.00  | 0.00  | 0.00  | 0.06 | 0.06  | 0.05  | 3.21  | 0.11 |
| Comamonadaceae         | 1.84         | 0.06  | 0.00  | 0.00  | 0.92 | 1.28  | 0.43  | 0.51  | 2.05 |
| <i>Chroococciopsis</i> | 1.88         | 1.06  | 0.00  | 13.59 | 1.40 | 3.80  | 5.95  | 4.20  | 1.77 |
| <i>Wenxinia</i>        | 1.62         | 0.17  | 0.00  | 0.00  | 1.50 | 0.98  | 1.08  | 3.72  | 1.21 |
| <i>Pelagibius</i>      | 0.15         | 0.09  | 0.00  | 0.00  | 0.39 | 0.55  | 0.60  | 3.74  | 0.14 |
| <i>Oscillatoria</i>    | 1.70         | 0.26  | 0.00  | 0.34  | 1.42 | 12.15 | 9.32  | 19.34 | 1.32 |
| Rhodospirillaceae      | 1.63         | 1.00  | 0.09  | 0.08  | 5.62 | 4.91  | 6.61  | 3.40  | 3.88 |
| <i>Rivularia</i>       | 6.97         | 0.11  | 0.00  | 0.34  | 9.60 | 10.31 | 2.40  | 2.09  | 5.21 |

**Supplementary Table S9** | Assignments of OTUs with at least a two percent relative abundance to genus or next lowest taxonomical unit and their respective relative abundance in each coral sample after one year of transplantation from *S. apicalis*' territories.

| Taxa                    | Coral Sample |       |       |       |       |       |       |       |       |
|-------------------------|--------------|-------|-------|-------|-------|-------|-------|-------|-------|
|                         | 1            | 2     | 3     | 4     | 5     | 6     | 7     | 8     | 9     |
| <i>Balneatrix</i>       | 1.09         | 0.97  | 3.33  | 0.10  | 0.00  | 5.66  | 1.55  | 0.00  | 0.38  |
| <i>Muricauda</i>        | 0.08         | 0.47  | 0.00  | 0.03  | 0.19  | 0.80  | 0.39  | 2.66  | 0.28  |
| Rhodobacteraceae        | 3.71         | 1.75  | 3.66  | 0.00  | 2.52  | 9.04  | 3.79  | 3.25  | 3.18  |
| <i>Rhodobium</i>        | 2.18         | 0.90  | 0.29  | 0.00  | 0.23  | 1.02  | 0.52  | 0.42  | 1.62  |
| <i>Crenothrix</i>       | 1.51         | 0.00  | 19.84 | 0.00  | 1.21  | 12.76 | 1.65  | 0.67  | 1.65  |
| <i>Pleurocapsa</i>      | 1.68         | 1.98  | 0.33  | 0.00  | 0.14  | 3.04  | 2.30  | 0.25  | 2.68  |
| <i>Ruegeria</i>         | 0.72         | 2.05  | 0.14  | 0.23  | 0.14  | 1.05  | 2.78  | 1.58  | 1.08  |
| <i>Massilia</i>         | 0.00         | 3.92  | 0.00  | 0.00  | 0.05  | 0.02  | 0.00  | 0.58  | 0.00  |
| <i>Bartonella</i>       | 0.00         | 0.00  | 0.00  | 0.00  | 0.00  | 0.00  | 0.00  | 0.00  | 15.34 |
| <i>Leptolyngbya</i>     | 1.80         | 0.50  | 0.14  | 0.00  | 0.14  | 4.83  | 3.50  | 0.58  | 3.36  |
| <i>Burkholderia</i>     | 0.00         | 0.45  | 3.19  | 0.30  | 0.05  | 0.00  | 0.13  | 6.99  | 0.00  |
| <i>Endozoicomonas</i>   | 0.47         | 42.92 | 58.33 | 92.70 | 83.52 | 0.07  | 45.21 | 14.65 | 0.47  |
| <i>Nitrosococcus</i>    | 2.56         | 0.22  | 0.67  | 0.03  | 0.23  | 0.67  | 0.16  | 0.58  | 1.06  |
| <i>Anabaena</i>         | 2.00         | 0.09  | 0.00  | 0.00  | 0.00  | 0.50  | 0.19  | 0.00  | 5.39  |
| <i>Calothrix</i>        | 0.06         | 0.30  | 1.38  | 0.00  | 0.70  | 5.78  | 0.13  | 0.00  | 0.24  |
| <i>Scherffelia</i>      | 1.97         | 0.67  | 0.00  | 0.07  | 0.00  | 0.20  | 0.94  | 15.15 | 1.06  |
| Cystobacterineae        | 0.28         | 0.00  | 0.00  | 1.58  | 0.51  | 0.12  | 0.55  | 2.83  | 0.59  |
| <i>Acinetobacter</i>    | 0.04         | 9.07  | 0.00  | 0.03  | 1.03  | 0.00  | 0.00  | 0.00  | 0.02  |
| Phyllobacteriaceae      | 0.72         | 1.23  | 0.33  | 0.00  | 0.00  | 0.87  | 1.23  | 0.92  | 2.92  |
| <i>Chroococidiopsis</i> | 3.63         | 0.24  | 0.05  | 0.00  | 0.00  | 2.52  | 3.85  | 15.40 | 3.20  |
| <i>Wenxinia</i>         | 0.09         | 0.86  | 0.05  | 0.00  | 0.56  | 2.14  | 1.88  | 1.08  | 0.64  |
| <i>Oscillatoria</i>     | 16.20        | 0.00  | 0.10  | 0.00  | 1.68  | 2.59  | 0.19  | 0.58  | 5.72  |
| Rhodospirillaceae       | 9.60         | 1.85  | 0.00  | 0.00  | 0.05  | 1.54  | 0.71  | 0.00  | 9.22  |
| <i>Ralstonia</i>        | 0.00         | 0.13  | 0.10  | 0.23  | 0.00  | 0.00  | 0.03  | 6.16  | 0.05  |
| <i>Rivularia</i>        | 0.38         | 12.81 | 0.38  | 0.00  | 1.40  | 8.30  | 1.29  | 0.17  | 1.25  |

**Supplementary Table S10** | Assignments of OTUs with at least a two percent relative abundance to genus or next lowest taxonomical unit and their respective relative abundance in each coral sample after one year of transplantation from *S. nigricans*' territories.

| Taxa                   | Coral Sample |       |       |       |       |       |       |       |       |       |
|------------------------|--------------|-------|-------|-------|-------|-------|-------|-------|-------|-------|
|                        | 1            | 2     | 3     | 4     | 5     | 6     | 7     | 8     | 9     | 10    |
| <i>Rivularia</i>       | 4.41         | 0.15  | 0.30  | 0.29  | 0.90  | 0.27  | 0.50  | 0.00  | 0.85  | 1.53  |
| Rhodobacteraceae       | 10.62        | 12.50 | 3.62  | 8.85  | 7.60  | 3.43  | 4.54  | 0.03  | 5.41  | 14.83 |
| <i>Mycoplasma</i>      | 3.49         | 0.00  | 0.00  | 0.00  | 0.00  | 0.00  | 0.00  | 0.00  | 0.00  | 0.10  |
| <i>Microcoleus</i>     | 0.49         | 2.34  | 0.00  | 1.89  | 0.31  | 0.44  | 0.79  | 0.03  | 0.07  | 0.10  |
| <i>Chroococciopsis</i> | 3.10         | 3.50  | 1.15  | 4.89  | 2.69  | 2.62  | 4.68  | 0.17  | 3.21  | 3.92  |
| <i>Anabaena</i>        | 1.58         | 0.83  | 2.93  | 2.68  | 0.55  | 1.62  | 1.76  | 0.07  | 0.68  | 3.56  |
| <i>Pellia</i>          | 0.22         | 0.00  | 0.00  | 1.51  | 0.23  | 0.10  | 6.38  | 0.14  | 0.00  | 0.00  |
| <i>Pseudovibrio</i>    | 0.00         | 0.00  | 0.00  | 0.00  | 0.00  | 0.00  | 0.00  | 0.06  | 7.62  | 0.00  |
| <i>Ruegeria</i>        | 1.58         | 0.56  | 12.20 | 0.84  | 2.22  | 0.34  | 0.76  | 0.00  | 4.31  | 0.80  |
| <i>Crenothrix</i>      | 8.55         | 12.60 | 0.36  | 5.13  | 13.84 | 3.06  | 1.08  | 0.03  | 1.71  | 15.23 |
| <i>Rhodobium</i>       | 0.71         | 0.95  | 0.16  | 1.28  | 0.31  | 0.56  | 1.05  | 0.00  | 2.28  | 0.40  |
| Nannocystineae         | 5.50         | 7.20  | 3.06  | 4.89  | 4.33  | 2.16  | 2.55  | 0.03  | 4.27  | 5.19  |
| <i>Pleurocapsa</i>     | 1.74         | 3.41  | 0.92  | 2.42  | 0.94  | 0.93  | 1.87  | 0.01  | 2.56  | 0.93  |
| <i>Calothrix</i>       | 11.55        | 2.07  | 18.45 | 2.13  | 1.52  | 0.07  | 0.94  | 0.04  | 2.85  | 14.83 |
| <i>Oscillatoria</i>    | 5.34         | 19.68 | 0.13  | 17.68 | 1.72  | 8.06  | 2.43  | 0.04  | 0.71  | 6.05  |
| Phyllobacteriaceae     | 2.56         | 1.31  | 1.28  | 0.84  | 1.72  | 1.18  | 1.00  | 0.07  | 1.89  | 0.70  |
| <i>Scherffelia</i>     | 3.59         | 0.34  | 2.43  | 4.25  | 4.60  | 2.28  | 14.81 | 0.11  | 3.03  | 1.63  |
| <i>Leptolyngbya</i>    | 1.53         | 1.36  | 1.84  | 2.74  | 1.01  | 0.88  | 1.73  | 0.01  | 1.07  | 1.03  |
| <i>Balneatrix</i>      | 7.24         | 3.09  | 2.93  | 3.20  | 2.81  | 1.59  | 1.70  | 0.01  | 7.51  | 2.86  |
| <i>Endozoicomonas</i>  | 0.00         | 0.51  | 23.72 | 0.17  | 1.48  | 0.00  | 0.00  | 96.25 | 17.09 | 0.00  |
| <i>Nitratireductor</i> | 0.00         | 0.00  | 1.28  | 0.03  | 0.04  | 0.00  | 0.09  | 0.00  | 6.02  | 0.00  |
| <i>Pedinomonas</i>     | 1.20         | 0.02  | 1.45  | 2.13  | 20.47 | 29.54 | 3.83  | 0.00  | 3.60  | 2.26  |
| <i>Coleochaete</i>     | 0.71         | 0.00  | 0.07  | 5.10  | 13.96 | 24.74 | 23.62 | 0.10  | 0.00  | 0.33  |
| Rhodospirillaceae      | 1.63         | 4.84  | 0.69  | 3.26  | 1.72  | 1.27  | 3.92  | 0.06  | 1.89  | 1.99  |
| Comamonadaceae         | 1.91         | 3.21  | 0.82  | 3.12  | 0.70  | 1.25  | 0.82  | 0.01  | 0.57  | 1.10  |

## References

- S1. Rjaniemi, P. *et al.* Phylogenetic and morphological evaluation of the genera *Anabaena*, *Aphanizomenon*, *Trichormus* and *Nostoc* (Nostocales, Cyanobacteria). *Int. J. Syst. Evol. Microbiol.* **55**, 11-26 (2005).
- S2. Blackburn, S. Microalgal applications in bioindustry. *Microbiology Australia* **29**, 30-31 (2008).
- S3. Marsac, N. T. *et al.* Photoregulation of gene expression in the filamentous cyanobacterium *Calothrix* sp. PCC 7601: light-harvesting complexes and cell differentiation. *Photosynth. Res.* **18**, 99-132 (1988).
- S4. Waterbury, J. & Stanier, R. Two unicellular cyanobacteria which reproduce while budding. *Arch. Microbiol.* **115**, 249-257 (1977).
- S5. Fewer, D., Friedl, T. & Budel, B. *Chroococcidiopsis* and heterocyst-differentiating cyanobacteria are each other's closest living relatives. *Mol. Phylogenet. Evol.* **23**, 82-90 (2002).
- S6. Delwiche, C. F., Graham, L. E. & Thomson, N. Lignin-like compounds and sporopollenin in *Coleochaete*, an algal model for land plant ancestry. *Science* **245**, 399-401 (1989).
- S7. Stoecker, K. *et al.* Cohn's *Crenothrix* is a filamentous methane oxidizer with an unusual methane monooxygenase. *Proc. Natl. Acad. Sci. U.S.A.* **103**, 2363-2367 (2006).
- S8. Nakamura, Y. *et al.* Complete genome structure of *Gloeobacter violaceus* PCC 7421, a cyanobacterium that lacks thylakoids. *DNA Res.* **10**, 137-145 (2003).
- S9. Goltsman, D. S. A. *et al.* Community genomic and proteomic analyses of chemoautotrophic iron-oxidizing "*Leptospirillum rubarum*" (Group II) and

- “*Leptospirillum ferrodiazotrophum*” (Group III) bacteria in acid mine drainage biofilms. *Appl. Environ. Microbiol.* **75**, 4599 (2009).
- S10. Karsten, U. & Garcia-Pichel, F. Carotenoids and mycosporine-like amino acids compounds in members of the genus *Microcoleus* (Cyanobacteria): a chemosystematic study. *System. Appl. Microbiol.* **19**, 285-294 (1996).
- S11. Klotz, M. G. *et al.* Complete genome sequence of the marine chemolithoautotrophic, ammonia-oxidizing bacterium *Nitrosococcus oceani* ATC 19707. *Appl. Environ. Microbiol.* **72**, 6299 (2006).
- S12. Turmel, M. *et al.* The complete mitochondrial DNA sequences of *Nephroselmis olivacea* and *Pedinomonas minor*: two radically different evolutionary patterns within green algae. *The Plant Cell* **11**, 1717-1729 (1999).
- S13. Odrzykoski, I. J., Chudzinska, E. & Szweykowski, J. The hybrid origin of the polyploid liverwort *Pellia borealis*. *Genetica* **98**, 75-86 (1998).
- S14. Wujek, D. E. Intracellular bacteria in the blue-green algae *Pleurocapsa minor*. *T. Am. Microsc. Soc.* **98**, 143-145 (1976).
- S15. Rocap, G. *et al.* Genome divergence in two *Prochlorococcus* ecotypes reflects oceanic niche differentiation. *Nature* **424**, 1042-1047 (2003).
- S16. Komarek, J. & Komarkova, J. Taxonomic review of the cyanoprokaryotic genera *Planktothrix* and *Planktothricoides*. *Czech Phycology* **4**, 1-18 (2004).
- S17. Pinevich, A., Velichko, N. & Ivanikova, N. Cyanobacteria of the genus *Prochlorothrix*. *Front. Microbiol.* **3**, 1-13 (2012).
- S18. Acinas, S. G., Haverkamp, T. H. A., Huisman, J. & Stal, L. J. Phenotypic and genetic diversification of *Pseudanabaena* spp. (cyanobacteria). *ISME J.* **3**, 31-46 (2009).
- S19. Madigan, M. T. Anoxygenic phototrophic bacteria from extreme environments. *Photosynth. Res.* **76**, 157-171 (2003).

- S20. Berrendero, E., Perona, E. & Mateo, P. Genetic and morphological characterization of *Rivularia* and *Calothrix* (Nostocales, Cyanobacteria) from running water. *Int. J. Syst. Evol. Micr.* **58**, 447-460 (2008).
- S21. Fuller, N. J. *et al.* Analysis of photosynthetic picoeukaryote diversity at open ocean sites in the Arabian Sea using a PCR biased towards marine algal plastids. *Aquat. Microb. Ecol.* **43**, 79-93 (2006).
- S22. Qiang, H., Zarmi, Y. & Richmond, A. Combined effects of light intensity, light-path and culture density on output rate of *Spirulina platensis* (Cyanobacteria). *Eur. J. Phycol.* **33**, 164-171 (1998).
- S23. Zouni, A. *et al.* Crystal structure of photosystem II from *Synechococcus elongatus* at 3.8 Å resolution. *Nature* **409**, 739-743 (2000).
- S24. Capone, D. G., Zehr, J. P., Paerl, H. W., Bergman, B. & Carpenter, E. J. *Trichodesmium*, a globally significant marine cyanobacterium. *Science* **276**, 1221-1229 (2014).
- S25. Urdiain, M. *et al.* Reclassification of *Rhodobium marinum* and *Rhodobium pfennigii* as *Afifella marina* gen. nov. comb. nov. and *Afifella pfennigii* comb. nov., a new genus of photoheterotrophic *Alphaproteobacteria* and emended descriptions of *Rhodobium*, *Rhodobium orientis* and *Rhodobium gokarnense*. *System. Appl. Microbiol.* **31**, 339-351 (2008).
- S26. Tsaplina, I. A. *et al.* The dependence of intracellular ATP level on the nutrition mode of the acidophilic bacteria *Sulfobacillus thermotolerans* and *Alicyclobacillus tolerans*. *Microbiol.* **76**, 654-662 (2007).
- S27. Brettar, I., Christen, R., Botel, J., Lunsdorf, H. & Hofle, M. G. *Anderseniella baltica* gen. nov., sp. nov., a novel marine bacterium of the *Alphaproteobacteria* isolated from sediment in the central Baltic Sea. *Int. J. Syst. Evol. Micr.* **57**, 2399-2405 (2007).

- S28. McIlroy, S. J. *et al.* Metabolic model for the filamentous ‘*Candidatus* Microthrix parvicella’ based on genomic and metagenomic analyses. *ISME J.* **7**, 1161-1172 (2013).
- S29. Pfannes, K. R., Vogl, K. & Overmann, J. Heterotrophic symbionts of phototrophic consortia: members of a novel diverse cluster of *Betaproteobacteria* characterized by a tandem *rrn* operon structure. *Environ. Microbiol.* **9**, 2782-2794 (2007).
- S30. Spring, S., Lunsdorf, H., Fuchs, B. M. & Tindall, B. J. The photosynthetic apparatus and its regulation in the aerobic gammaproteobacterium *Congregibacter litoralis* gen. nov., sp. nov. *PLoS ONE* **4**, e4866 (2009).
- S31. Brinkhoff, T. *et al.* Biogeography and phylogenetic diversity of a cluster of exclusively marine myxobacteria. *ISME J.* **6**, 1260-1272 (2012).
- S32. Du, Z., Zhang, W., Xia, H., Lu, G. & Chen, G. Isolation and diversity analysis of heterotrophic bacteria associated with sea anemones. *Acta. Oceanol. Sin.* **229**, 62-69 (2010).
- S33. Staley, J. T., Irgens, R. & Brenner, D. J. *Enhydrobacter aerosaccus* gen. nov., sp. nov., a gas-vacuolated, facultatively anaerobic, heterotrophic rod. *Int. J. Syst. Bacter.* **37**, 289-291 (1987).
- S34. Angert, E. R & Clements, K. D. Initiation of intracellular offspring in *Epulopiscium*. *Molec. Microbiol.* **51**, 827-835 (2004).
- S35. Anderson, R. T. *et al.* Stimulating the in situ activity of *Geobacter* species to remove uranium from the groundwater of a uranium-contaminated aquifer. *Appl. Environ. Microbiol.* **69**, 5884 (2003).
- S36. Jeong, S. *et al.* Bacterail community structure in a biofilter used as a pretreatment for seawater desalination. *Ecol. Eng.* **60**, 370-381 (2013).

- S37. Jean, W. D., Huang, S.-P., Chen, J.-S. & Shieh, W. Y. *Kangiella taiwanensis* sp. nov. and *Kangiella marina* sp. nov., marine bacteria isolated from shallow coastal water. *Int. J. Syst. Evol. Micr.* **62**, 2229-2234 (2012).
- S38. Graca, A. P. *et al.* Antimicrobial activity of heterotrophic bacterial communities from marine sponge *Erylus discophorus* (Astrophorida, Geodiidae). *PLoS ONE* **8**, e78992 (2013).
- S39. Kleerebezem, M. *et al.* Complete genome sequence of *Lactobacillus plantarum* WCFS1. *Proc. Natl. Acad. Sci. U.S.A.* **100**, 1990-1995 (2003).
- S40. Williams, T. M. & Unz, R. F. The nutrition of *Thiothrix*, type 021N, *Beggiatoa* and *Leucothrix* strains. *Wat. Res.* **23**, 15-22 (1989).
- S41. Calugay, R. J. *et al.* Catechol siderophore excretion by magnetotactic bacterium *Magnetospirillum magneticum* AMB-1. *J. Biosci. Bioeng.* **101**, 445-447 (2006).
- S42. Amin, S. A., Green, D. H., Al Waheeb, D., Gardes, A. & Carrano, C. J. Iron transport in the genus *Marinobacter*. *Biometals* **25**, 135-147 (2012).
- S43. Kampfner, P., Lodders, N., Marin, K. & Falsen, E. Revision of the genus *Massilia* La Scola *et al.* 2000, with an emended description of the genus and inclusion of all species of the genus *Naxibacter* as new combinations, and proposal of *Massilia consociata* sp. nov. *Int. J. Syst. Evol. Micr.* **61**, 1528-1533 (2011).
- S44. Kaneko, T. *et al.* Complete genome structure of the nitrogen-fixing symbiotic bacterium *Mesorhizobium loti*. *DNA Res.* **7**, 331-338 (2000).
- S45. Patt, T. E., Cole, G. C. & Hanson, R. S. *Methylobacterium*, a new genus of facultatively methylotrophic bacteria. *Int. J. Syst. Bacteriol.* **26**, 226-229 (1976).
- S46. Bruns, A., Rohde, M. & Berthe-Corti, L. *Muricauda ruestringensis* gen. nov., sp. nov., a facultatively anaerobic, appendaged bacterium from German North Sea intertidal sediment. *Int. J. Syst. Evol. Micr.* **51**, 1997-2006 (2001).



- S47. Hedlund, B. P. & Costa, K. C. [*Neptunomonas*] *Handbook of Hydrocarbon and Lipid Microbiology* [Timmis, K. N. (ed.)] [1773-1779] (Springer-Verlag, Berlin, 2010).
- S48. Labbe, N., Parent, S. & Villemur, R. *Nitrateductor aquibiodomus* gen. nov., sp. nov., a novel  $\alpha$ -proteobacterium from the marine denitrification system of the Montreal Biodome (Canada). *Int. J. Syst. Evol. Micr.* **54**, 269-273 (2004).
- S49. Sakane, T. & Yokota, A. Chemotaxonomic investigation of heterotrophic, aerobic and microaerophilic spirilla, the genera *Aquaspirillum*, *Magnetospirillum* and *Oceanospirillum*. *Syst. Appl. Microbiol.* **17**, 128-134 (1994).
- S50. Choi, D. H., Hwang, C. Y. & Cho, B. C. *Pelagibius litoralis* gen. nov., a marine bacterium in the family *Rhodospirillaceae* isolated from coastal seawater. *Int. J. Syst. Evol. Micr.* **59**, 818-823 (2009).
- S51. Sun, J., Haveman, S. A., Bui, O., Fahland, T. R. & Lovley, D. R. Constraint-based modeling analysis of the metabolism of two *Pelobacter* species. *BMC Syst. Biol.* **4**, 174 (2010).
- S52. Thomas, T. *et al.* Functional genomic signatures of sponge bacteria reveal unique and shared features of symbiosis. *ISME J.* **4**, 1557-1567 (2010).
- S53. Cassler, M. *et al.* Use of real-time qPCR to quantify members of the unculturable heterotrophic bacterial community in a deep sea marine sponge, *Vetulina* sp. *Microb. Ecol.* **55**, 384-394 (2008).
- S54. Michaud, L. *et al.* Phylogenetic characterization of the heterotrophic bacterial communities inhabiting a marine recirculating aquaculture system. *J. Appl. Microbiol.* **107**, 1935-1946 (2009).
- S55. Hiraishi, A., Urata, K. & Satoh, T. A new genus of marine budding phototrophic bacteria, *Rhodobium* gen. nov., which includes *Rhodobium orientis* sp. nov. and *Rhodobium marinum* comb. nov. *Int. J. Syst. Bacter.* **45**, 226-234 (1995).

- S56. Martens, T. *et al.* Reclassification of *Roseobacter gallaeciensis* Ruiz-Ponte *et al.* 1998 as *Phaeobacter gallaeciensis* gen. nov., comb. nov., description of *Phaeobacter inhibens* sp. nov., reclassification of *Ruegeria algicola* (Lafay *et al.* 1995) Uchino *et al.* 1999 as *Marinovum algicola* gen. nov., comb. nov., and emended descriptions of the genera *Roseobacter*, *Ruegeria* and *Leisingera*. *Int. J. Syst. Evol. Microbiol.* **56**, 1293-1304 (2006).
- S57. Madigan, M., Cox, S. S. & Stegeman, R. A. Nitrogen fixation and nitrogenase activities in members of the family *Rhodospirillaceae*. *J. Bacteriol.* **157**, 73 (1984).
- S58. Khatri, I., Nupur Korpole, S., Subramanian, S. & Pinnaka, A. K. Draft genome sequence of *Rhodovulum* sp. strain PH10, a phototrophic Alphaproteobacterium isolated from a soil sample of mangrove of Namkhana, India. *J. Bacteriol.* **194**, 6363 (2012).
- S59. Mosso, M. A., de la Rosa, M. C., Vivar, C. & Medina, M. R. Heterotrophic bacterial populations in the mineral waters of thermal springs in Spain. *J. Appl. Bacteriol.* **77**, 370-381 (1994).
- S60. Glockner, F. O. *et al.* Complete genome sequence of the marine planctomycete *Pirellula* sp. strain 1. *Proc. Nat. Acad. Sci. U.S.A.* **100**, 8298-8303 (2003).
- S61. Hyun, D.-W. *et al.* Genome sequence of the moderately halophilic bacterium *Salinicoccus carniancri* type strain Crm<sup>T</sup> (=DSM 23852<sup>T</sup>). *Stand. Genomic Sci.* **8**, 255-263 (2013).
- S62. Lopez-Lopez, A. *et al.* *Thalassospira lucentensis* gen. nov., sp. nov., a new marine member of the  $\alpha$ -Proteobacteria. *Int. J. Syst. Evol. Micr.* **52**, 1277-1283 (2002).
- S63. Ying, J.-Y. *et al.* *Wenxinia marina* gen. nov., sp. nov., a novel member of the *Roseobacter* clade isolated from oilfield sediments of the South China Sea. *Int. J. Syst. Evol. Micr.* **57**, 1711-1716 (2007).

- S64. Werren, J. H. Biology of *Wolbachia*. *Annu. Rev. Entomol.* **42**, 587-609 (1997).
- S65. Bergogne-Berezin, E. & Towner, K. J. *Acinetobacter* spp. as nosocomial pathogens: microbiological, clinical, and epidemiological features. *Clin. Microbiol. Rev.* **9**, 148-165 (1996).
- S66. Janda, J. M. & Abbott, S. L. Evolving concepts regarding the genus *Aeromonas*: an expanding panorama of species, disease presentations, and unanswered questions. *Clin. Infect. Dis.* **27**, 332-344 (1998).
- S67. Dauga, C. *et al.* *Balneatrix alpica* gen. nov., sp. nov., a bacterium associated with pneumonia and meningitis in a spa therapy centre. *Res. Microbiol.* **144**, 35-46 (1993).
- S68. Anderson, B. E. & Neuman, M. A. *Bartonella* spp. As emerging human pathogens. *Clin. Microbiol. Rev.* **10**, 203-219 (1997).
- S69. Govan, J. R. & Deretic, V. Microbial pathogenesis in cystic fibrosis: mucoid *Pseudomonas aeruginosa* and *Burkholderia cepacia*. *Microbiol. Rev.* **60**, 539 (1996).
- S70. Schmitz-Esser, S. *et al.* The genome of the amoeba symbiont “*Candidatus* Amoebophilus asiaticus” reveals common mechanisms for host cell interaction among amoeba-associated bacteria. *J. Bacteriol.* **192**, 1045 (2010).
- S71. Calderon, G. *et al.* *Chryseobacterium indologenes* infection in a newborn: a case report. *J. Med. Case Rep.* **5**, 10 (2011).
- S72. Freeman, V. J. Studies of the virulence of bacteriophage-infected strains of *Corynebacterium diphtheriae*. *J. Bacteriol.* **61**, 675-688 (1951).
- S73. Xu, H.-S. *et al.* Survival and viability of nonculturable *Escherichia coli* and *Vibrio cholerae* in the estuarine and marine environment. *Microb. Ecol.* **8**, 313-323 (1982).
- S74. Myers, J. L., Sekar, R. & Richardson, L. L. Molecular detection and ecological significance of the cyanobacterial genera *Geitlerinema* and *Leptolyngbya* in black band disease of corals. *Appl. Environ. Microbiol.* **73**, 5173-5182 (2007).

- S75. Arenskotter, M., Broker, D. & Steinbuchel, A. Biology of the metabolically diverse genus *Gordonia*. *Appl. Environ. Microbiol.* **70**, 3195 (2004).
- S76. Stevens, D. A., Hamilton, J. R., Johnson, N., Kim, K. K. & Lee, J.-S. *Halomonas*, a newly recognized human pathogen causing infections and contamination in a dialysis center: Three new species. *Medicine* **88**, 244-249 (2009).
- S77. Kloos, W. E. & Musselwhite, M. S. Distribution and persistence of *Staphylococcus* and *Micrococcus* species and other aerobic bacteria on human skin. *Appl. Environ. Microbiol.* **30**, 381 (1975).
- S78. Tully, J. G., Taylor-Robinson, D., Cole, R. M. & Rose, D. L. A newly discovered mycoplasma in the human urogenital tract. *Lancet.* **1**, 1288-1291 (1981).
- S79. Brook, I. & Frazier, E. H. Infections caused by *Propionibacterium* species. *Clin. Infect. Dis.* **13**, 815-818 (1991).
- S80. Stover, C. K. *et al.* Complete genome sequence of *Pseudomonas aeruginosa* PA01, an opportunistic pathogen. *Nature* **406**, 959-964 (2000).
- S81. Salanoubat, M. *et al.* Genome sequence of the plant pathogen *Ralstonia solanacearum*. *Nature* **415**, 497-502 (2002).
- S82. Richardson, L. L. *et al.* Florida's mystery coral-killer identified. *Nature* **392**, 557-558 (1998).
- S83. Lowy, F. D. *Staphylococcus aureus* infections. *New Engl. J. Med.* **339**, 520-532 (1998).
